# Supplementary material for: Candida albicans Morphology-Dependent Host FGF-2 Response as a Potential Therapeutic Target
Source: J Fungi (Basel). 2019 Mar 5;5(1):22. doi: 10.3390/jof5010022 (PMC6462958; doi:10.3390/jof5010022)
Supplement: Supplementary file 1 [file jof-05-00022-s001.pdf]

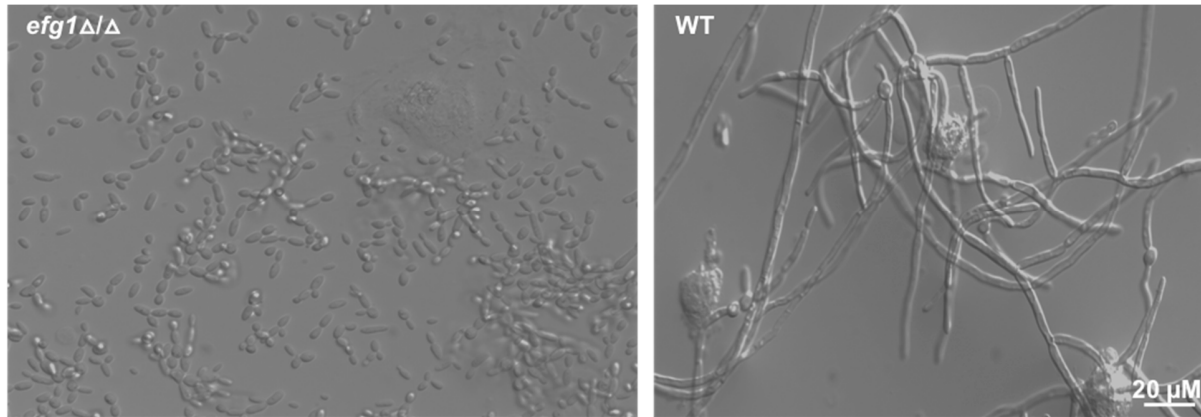

**Figure S1. A comparison of *C. albicans* *efg1*Δ/Δ and WT (SC5314) morphology in the presence of host endothelial cells.**

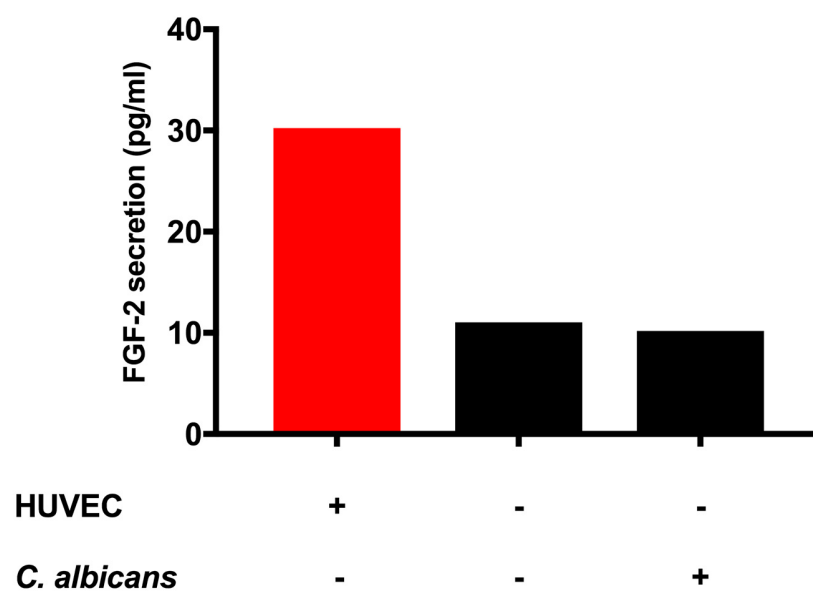

Figure S2. Comparison of FGF-2 expression between HUVEC only, medium only, and *C. albicans* only. No difference was observed between medium only and *C. albicans* only groups.

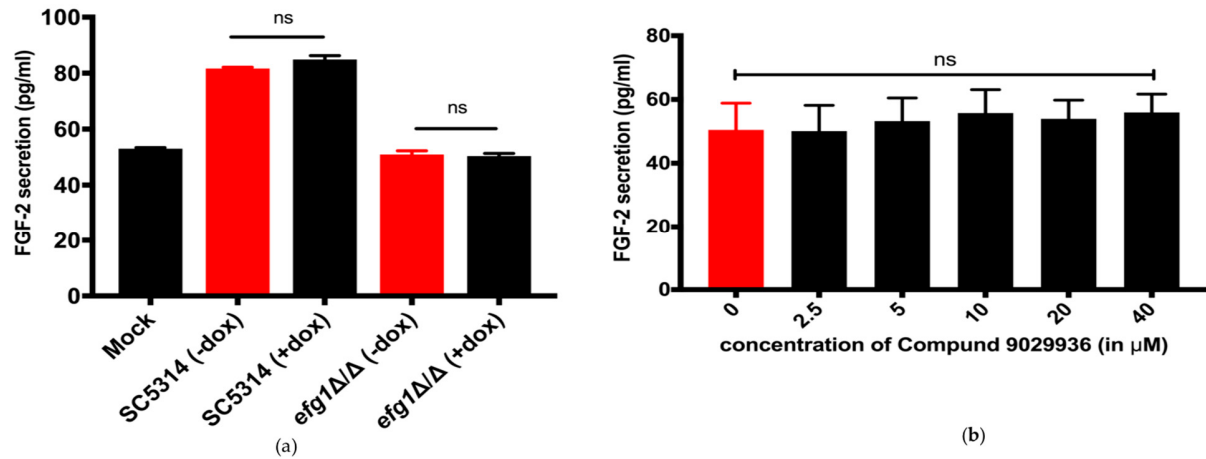

**Figure S3. Neither doxycycline nor compound 9029936 itself affect HUVEC FGF-2 response.**

a) HUVECs were challenged with wild-type strain SC5314 or *efg1Δ/Δ* (which does not have *tet* regulatable gene) in the absence or presence of doxycycline for 24 hours before measuring FGF-2 levels using ELISA. One-way ANOVA was significant ( $P < 0.0001$ ). Tukey's multiple comparison test noted no significant difference between +dox and -dox groups of both SC5314 and *efg1Δ/Δ*. b) HUVECs were treated with 0 to 40  $\mu\text{M}$  of compound 9029936 for 24 hours and the FGF-2 levels were measured in the supernatants. One-way ANOVA was not significant ( $P = 0.98$ ).

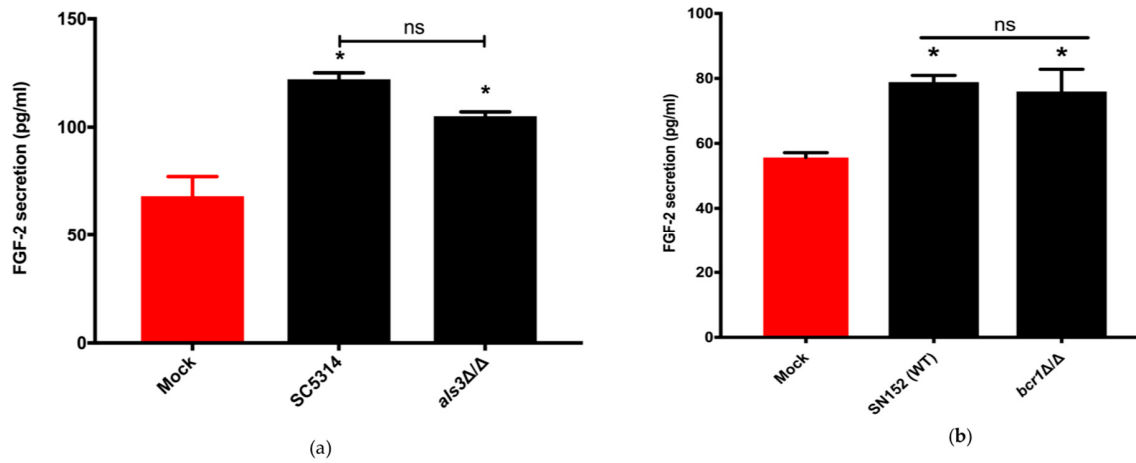

**Figure S4. *ALS3* and *BCR1*-regulated cell wall proteins are not involved in the regulation of host FGF-2 secretion.** a) HUVECs were challenged with either SC5314 or *als3Δ/Δ*. *C. albicans* strains for 24 hours. FGF-2 levels were measured using ELISA. While one-way ANOVA ( $P = 0.0002$ ) and Dunnett's multiple comparison demonstrated a statistically significant difference ( $P < 0.05$ ) between the mock and SC5314/*als3Δ/Δ* infected groups, (as indicated by \*), there was no significant difference between the SC5314 and *als3Δ/Δ* ( $P = 0.134$ ) groups. b) HUVECs were challenged with either the *bcr1Δ/Δ* mutant or SN152 parental strain for 24 hours. FGF-2 levels were measured using ELISA. Again, one-way ANOVA ( $P = 0.015$ ) and Dunnett's multiple comparison ( $P < 0.05$ ) only showed a statistically significant difference between mock and *C. albicans* challenged groups, (indicated by \*). There was no significant difference between the SN152 parental strain and *bcr1Δ/Δ* mutant challenged groups ( $P = 0.134$ ).

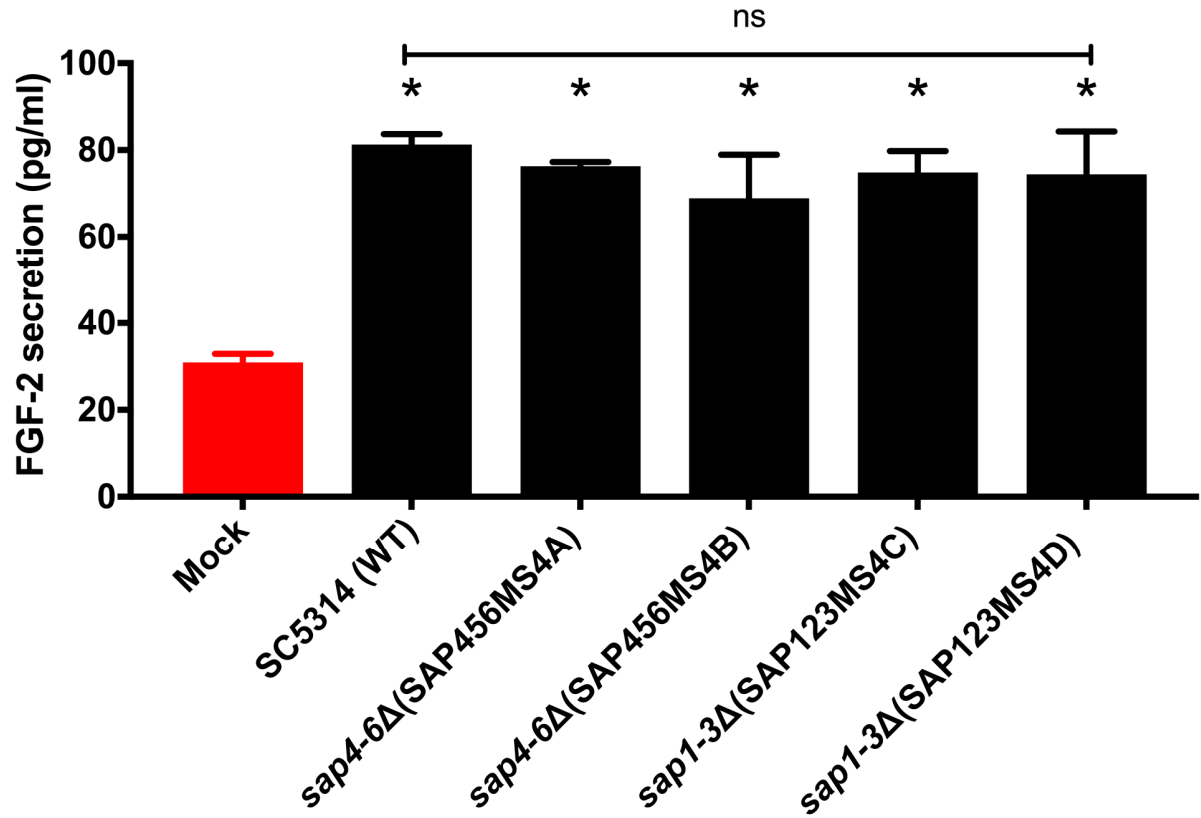

**Figure S5. Sap proteins are not linked with host endothelial FGF-2 response.** HUVECs were challenged with either SC5314 (WT) or the *sap1-3Δ/Δ* or *sap4-6Δ/Δ* mutant strains. Both one-way ANOVA ( $P = 0.0008$ ) and Dunnett's multiple comparison ( $P < 0.05$ ) demonstrated a statistically significant difference between the mock and all *C. albicans* infected groups, as indicated by (\*). However, no significant difference was observed between SC5314 wild-type and *sap1-3Δ/Δ/sap4-6Δ/Δ* mutant infected groups ( $P > 0.05$ ).

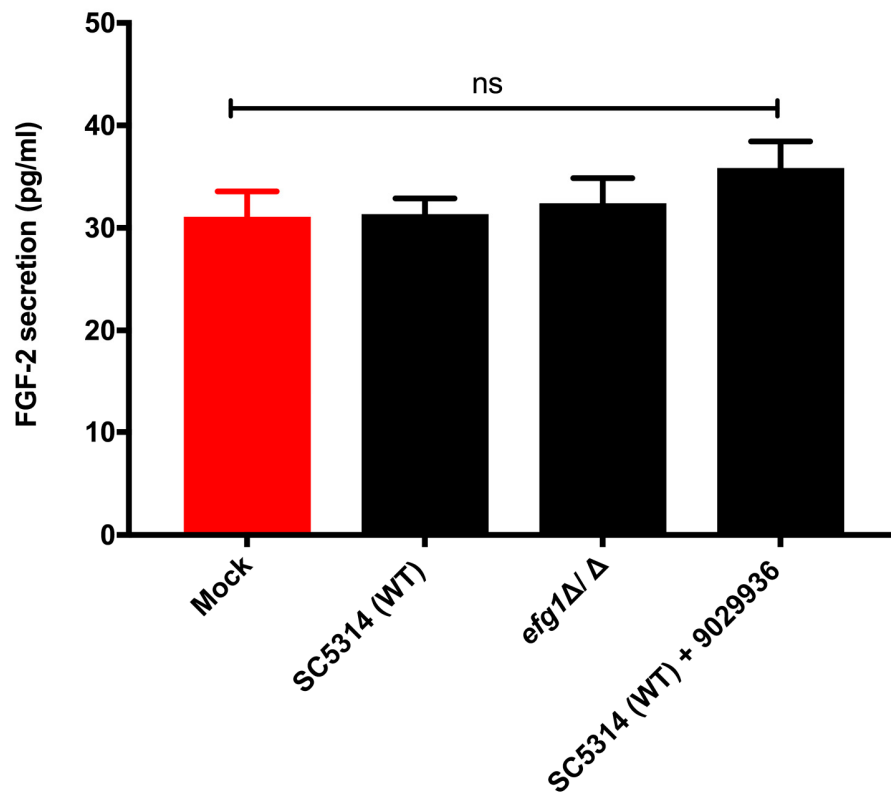

**Figure S6. *C. albicans* spent medium is not sufficient to increase host FGF-2 response.** *C. albicans* SC5314, *efg1Δ/Δ* or SC5314 + Compound 9029936 (10  $\mu$ M) were grown in EBM at 37°C for 24 hours. The spent medium was filtered and added to HUVEC cultures for 24 hours. One-way ANOVA displayed no statistically significant difference in FGF-2 secretion between the groups ( $P = 0.287$ ).
